# Supplementary material for: Enhanced PMS/O2 activation by self-crosslinked amine-gluteraldehyde/chitosan-Cu biocomposites for efficient degradation of HEPES as biological pollutants and selective allylic oxidation of cyclohexene
Source: Royal Society of Chemistry journal article supplement (doi:10.1039/d2nj05161c), 2023-01-01
Supplement: d2nj05161c1.pdf [file d2nj05161c1.pdf]

Electronic Supplementary Material (ESI) for **New Journal Chemistry**.

## Supplementary data

# Enhanced PMS/O<sub>2</sub> Activation by Self-Crosslinked Amine Gluteraldehyde/Chitosan-Cu Biocomposite for Efficient Degradation of HEPES as Biological Pollutant and Selective Allylic Oxidation of Cyclohexene

Sara Movahedian<sup>a</sup>, Alireza Faraji<sup>\*,a,b</sup> and Fatemeh Ashouri<sup>c</sup>

<sup>a</sup>*Department of Organic Chemistry, Faculty of Pharmaceutical Chemistry, Tehran Medical Sciences, Islamic Azad University, Tehran, Iran.*

<sup>b</sup>*Nutrition and Food Sciences Research Center, Tehran Medical Sciences, Islamic Azad University, Tehran, Iran.*

<sup>c</sup>*Department of Applied Chemistry, Faculty of Pharmaceutical Chemistry, Tehran Medical Sciences, Islamic Azad University, Tehran, Iran.*

*Corresponding author. Tel.: +98 21 22640051; fax: +98 21 22600099.  
E-mail address: alireza\_ch57@yahoo.com, a.faraji@iaups.ac.ir*

## **Text. 1S. *Experimental reagent and materials***

Iron (II)-chloride tetrahydrate ( $\text{FeCl}_2 \cdot 4\text{H}_2\text{O}$ ), Iron (III)-chloride hexahydrate ( $\text{FeCl}_3 \cdot 6\text{H}_2\text{O}$ ), hydrochloric acid (HCl, 37%), sodium hydroxide solution (NaOH, 1.5 M), ethanol (EtOH), ammonia solution ( $\text{NH}_3$ , 25%), tetraethyl orthosilicate (TEOS,  $\text{Si}(\text{OC}_2\text{H}_5)_4$ ), *N*-(2-Aminoethyl)-3-aminopropyltrimethoxysilan (APTS,  $\text{H}_2\text{N}(\text{CH}_2)_2\text{NH}(\text{CH}_2)_3\text{Si}(\text{OCH}_3)_3$ ), acetic acid ( $\text{CH}_3\text{CO}_2\text{H}$ ), chitosan ,glutaraldehyde solution ( $\text{OHC}(\text{CH}_2)_3\text{CHO}$ , 25%) and  $\text{CuCl}_2 \cdot 2\text{H}_2\text{O}$  were obtained from Merck, Fluka and Sigma-Aldrich Co., Ltd., and utilized without further purification for MS/(AgC)-Cu NP preparation. Potassium peroxydisulfate (Oxone, PMS,  $\text{KHSO}_5 \cdot 0.5\text{KHSO}_4 \cdot 0.5\text{K}_2\text{SO}_4$ ), methylene blue (MB), methylene orange (MO), bisphenol A (BPA), *N,N*-dihydroxypyromellitimide (NDHPI,  $\text{C}_{10}\text{H}_6\text{N}_2\text{O}_6$ ) and Cyclohexene ( $\text{C}_6\text{H}_{10}$ ) were purchased from Sigma-Aldrich and utilized for dye degradation and aerobic oxidation processes without further purification.

## **Text. 2S. *Characterization of biocomposite***

the instrument for characterization and analyze of products are mentioned blow: ICP-AES (Perkin-Elmer ICP/6500); AAS (Analytik Jena-nov AA300); ICP-OES (SPECTRO ARCOS, Germany); Brunauer–Emmett–Teller (BET; BELSORP MINI II, BEL, Japan); TEM (Philips 501 microscope, 80 kV voltage); SEM (Tecnai F30TEM operating at 300 Kv); FT-IR (Shimadzu Varian 4300 Fourier Transform Infrared spectrometer, KBr pellets); UV-DRS (UV- 160 A, Shimadzu, Japan) TGA (Perkin-Elmer TG-DTA 6300, heating rate of 15 °C/min); XPS (PerkinElmer PHI 5000CESCA system, B.P= 9-10 Torr; XRD (Bruker D8 Advance diffractometer, CuK $\alpha$  radiation, 40 Kv, 20 mA) & VSM ( BHV-55 VSM). LC-MS (HP 6890/5973 GC/MS, Shimadzu GC-16A gas chromatograph (GL-16, 5 m -3 mm OV-17 column, 60–220 °C (10 °C/min), Inj. 230 °C, Det. 240 °C).

### **Text 3S. Analytical methods**

The dosage of HEPES was determined using High-Performance Liquid Chromatography (HPLC) system equipped with an Amaze TH column (100 mm×3.0 mm, 3µm, 100 Å). A binary mixture of acetonitrile/ water/ammonium format at a certain ratio was applied as mobile phase. The flow rate of eluent was set at 0.6 mL/min, while the injection volume was set at 3.0 mL, thermostatted at 30 °C. Furthermore, Methyl orange (MO), Methylene Blue (MB), and Bisphenol A (BPA) were measured at 466 nm, 660 nm, and 265 nm, respectively, by a spectrometer (UV-1800 PC, Shanghai Mapada Spectrum Instrument Co.,LTD). The leached concentrations of Cu ions were quantified by inductively coupled plasma atomic emission spectroscopy (ICP-AES, Perkin Elmer, Optima 8000, USA). The total organic carbon was measured by a TOC analyzer (Muti N/C 2000, Germany).

**PMS decomposition measurement:** The PMS concentrations were measured with a modified colorimetric method using potassium iodide by spectrophotometer. At selected time intervals, 0.1 mL of TC solution was periodically withdrawn with a syringe and dispersed into a prepared 4.9 mL KI:NaHCO<sub>3</sub> stock solution (4.15:1 w/w in 100 mL ultrapure water). After reaction for 5 min, the concentration of PMS was examined by observing the absorbance maxima peaks of PMS at 352 nm.

**Reusability test:** The spent MS-(AgC)/Cu was separated with an external magnet and washed with water/EtOH under ultrasonic conditions, and then reutilized in the next consecutive cycles.

**Table 1S.** Chemical structures and capabilities of the selected pollutants.

| Sample                   | $\lambda_{\max}$<br>(nm) | Mw<br>(g/mol) | Name (IUPAC)                                                           | Molecular structure                                                                 |
|--------------------------|--------------------------|---------------|------------------------------------------------------------------------|-------------------------------------------------------------------------------------|
| Methylene orange<br>(MO) | 466                      | 327.33        | Sodium 4- {[4-(dimethylamino)phenyl]diazenyl} benzene-1-sulfonate      | 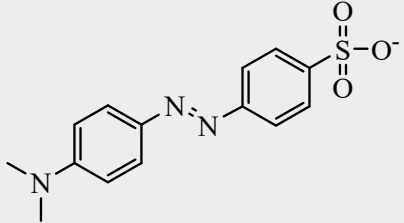 |
| Methylene blue<br>(MB)   | 664                      | 319.85        | [7-(Dimethyl- amino)phenothiazin-3-ylidene]-dimethyla- zanium chloride |  |
| Bisphenol A<br>(BPA)     | 265                      | 228.29        | 4-[2-(4-hydroxyphenyl)propan-2-yl]phenol                               |  |

**Table 2S.** Identified HEPES degradation intermediates in the PMS/MS-(AgC)/Cu.

| [In] | Name                                             | ESI (+)<br>MS ( <i>m/z</i> ) | Structure                                                                            | Differences<br>from<br>HEPES                                  |
|------|--------------------------------------------------|------------------------------|--------------------------------------------------------------------------------------|---------------------------------------------------------------|
| P1   | 1,4-diethylpiperazine                            | 208.09                       | 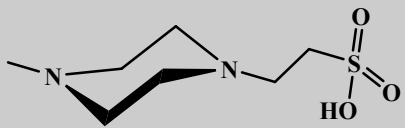   | -CH <sub>2</sub><br>-OH                                       |
| P2   | 1,4-diethylpiperazine                            | 142.15                       |    | -OH<br>-SO <sub>3</sub> H                                     |
| P3   | 1-ethyl-4-methylpiperazine                       | 128.13                       |    | -CH <sub>2</sub><br>-OH<br>-SO <sub>3</sub> H                 |
| P4   | Piperazine                                       | 86.08                        |  | -2 C <sub>2</sub> H <sub>4</sub><br>-OH<br>-SO <sub>3</sub> H |
| P5   | 2-(4-ethylpiperazin-1-yl)ethane-1-sulfonic acid  | 222.10                       |  | -OH                                                           |
| P6   | 2-(4-methylpiperazin-1-yl)ethane-1-sulfonic acid | 208.09                       |  | -CH <sub>2</sub><br>-OH                                       |
| P7   | 2-(4-piperazin-1-yl)ethane-1-sulfonic acid       | 194.07                       |  | -C <sub>2</sub> H <sub>4</sub><br>-OH                         |

**Table 3S.** Comparison of catalytic activity of MS-(AgC)/Cu with various catalytic systems.

| <i>Pol.</i>                                                     | Catalytic System                                                                                                           | <i>t</i><br>(min)                                                            | Oxidant<br>[c]                            | Efficiency<br>(%)                      | pH      | [Ref]            |                  |
|-----------------------------------------------------------------|----------------------------------------------------------------------------------------------------------------------------|------------------------------------------------------------------------------|-------------------------------------------|----------------------------------------|---------|------------------|------------------|
| <b>MB</b>                                                       | SBMC [0.4 g/L] <sup>1</sup>                                                                                                | 3                                                                            | H <sub>2</sub> O <sub>2</sub> [39 mmol/L] | 98.5                                   | 3.00    | [1]              |                  |
|                                                                 | Magnesium porphyrin [5.0 mg] <sup>2</sup>                                                                                  | 25                                                                           | H <sub>2</sub> O <sub>2</sub> [4.0 mL]    | 82.0                                   | 6.00    | [2]              |                  |
|                                                                 | Fe@S-1 [50 mg] <sup>3</sup>                                                                                                | 30                                                                           | H <sub>2</sub> O <sub>2</sub> [4.0 mL]    | 100                                    | 2.00    | [3]              |                  |
|                                                                 | MgCoAl-LDH [1.0 mg] <sup>4</sup>                                                                                           | 40                                                                           | PMS [1.0 mmol/L]                          | 100                                    | 6.00    | [4]              |                  |
|                                                                 | CuFe <sub>2</sub> O <sub>4</sub> @ZIF-67 [100 mg/L] <sup>5</sup>                                                           | 30                                                                           | PMS [100 mg/L]                            | 98.9                                   | 6.40    | [5]              |                  |
|                                                                 | CuCo-ZIF [50 mg/L] <sup>6</sup>                                                                                            | 100                                                                          | H <sub>2</sub> O <sub>2</sub> [0.1 mol/L] | 98.0                                   | 3.00    | [6]              |                  |
|                                                                 | Co <sub>3</sub> O <sub>4</sub> /CoO/NaHSO <sub>3</sub> [0.6 g/L]                                                           | 40                                                                           | NaHSO <sub>3</sub> [2.0 g/L]              | 90.7                                   | 6.38    | [7]              |                  |
|                                                                 | Ce-doped UiO-67- 400/H <sub>2</sub> O <sub>2</sub> [1.0 g/L] <sup>7</sup>                                                  | 30                                                                           | H <sub>2</sub> O <sub>2</sub> [7 mmol/L]  | 94.1                                   | 3.00    | [8]              |                  |
|                                                                 | Fe <sub>41</sub> Co <sub>7</sub> Cr <sub>15</sub> Mo <sub>14</sub> C <sub>15</sub> B <sub>6</sub> Y <sub>2</sub> [0.5 g/L] | 30                                                                           | H <sub>2</sub> O <sub>2</sub> [4 mmol/L]  | 98.0                                   | 5.00    | [9]              |                  |
|                                                                 | Mg/Co (OH) <sub>2</sub> [1.0 g/L]                                                                                          | 120                                                                          | H <sub>2</sub> O <sub>2</sub> [10 mg/L]   | 99.6                                   | >7.0    | [10]             |                  |
|                                                                 | NbCeO <sub>x</sub> [20 mg] <sup>8</sup>                                                                                    | 60                                                                           | H <sub>2</sub> O <sub>2</sub> [200 μL]    | 83.0                                   | 5.10    | [11]             |                  |
|                                                                 | FeCo <sub>2</sub> O <sub>4</sub> -N-C-400 [0.010 g] <sup>9</sup>                                                           | 10                                                                           | PMS [0.5 g/L]                             | 100                                    | Natural | [12]             |                  |
|                                                                 | FeMnO <sub>3</sub> [0.2 g/L]                                                                                               | 60                                                                           | PMS [2.0 g/L]                             | 98.0                                   | 6.70    | [13]             |                  |
|                                                                 | Fe <sub>3</sub> O <sub>4</sub> @MnO <sub>2</sub> [300 mg/L]                                                                | 30                                                                           | PMS [20 mM]                               | 100                                    | 7.94    | [14]             |                  |
|                                                                 | CS-Fe [10000 mg/L] <sup>10</sup>                                                                                           | 40                                                                           | H <sub>2</sub> O <sub>2</sub> [1200 mg/L] | 99.0                                   | Natural | [15]             |                  |
|                                                                 | MS-(AgC)/Cu [0.5 g/L]                                                                                                      | 60                                                                           | PMS [1.5 mM]                              | 97.3                                   | 7.00    | <b>This work</b> |                  |
|                                                                 | <b>MO</b>                                                                                                                  | MOP <sup>11</sup>                                                            | 20                                        | H <sub>2</sub> O <sub>2</sub> [2.0 mL] | 98.0    | 1.70             | [16]             |
| CC-MIL-10-DCD-1000 [0.1 g/L] <sup>12</sup>                      |                                                                                                                            | 30                                                                           | PMS [0.3 mM]                              | 99.0                                   | 7.00    | [17]             |                  |
| ACP-800 [0.5 g/L] <sup>13</sup>                                 |                                                                                                                            | 80                                                                           | PMS [1.6 mM]                              | 100                                    | 3.50    | [18]             |                  |
| FOC [1.0 mg/mL] <sup>14</sup>                                   |                                                                                                                            | 50                                                                           | H <sub>2</sub> O <sub>2</sub> [2.0 M]     | 100                                    | 3.00    | [19]             |                  |
| Ni/HAP/CoFe <sub>2</sub> O <sub>4</sub> [0.04 mg] <sup>15</sup> |                                                                                                                            | 90                                                                           | H <sub>2</sub> O <sub>2</sub> [1.0 mL]    | 90.0                                   | 3.50    | [20]             |                  |
| FeCo-MCM-41 [0.2 g]                                             |                                                                                                                            | 60                                                                           | PMS [0.075 mM]                            | 95.65                                  | 5.60    | [21]             |                  |
| CuO NLS [7.0 mL, 53 μg/ml] <sup>16</sup>                        |                                                                                                                            |                                                                              | H <sub>2</sub> O <sub>2</sub> [1.0 mL]    | 100                                    | -       | [22]             |                  |
| Cu <sub>2</sub> O-Cu/C                                          |                                                                                                                            | 20                                                                           | H <sub>2</sub> O <sub>2</sub> [0.03 M]    | 100                                    | 3.00    | [23]             |                  |
| MS-(AgC)/Cu [0.5 g/L]                                           |                                                                                                                            | 50                                                                           | PMS [1.5 mM]                              | 98.0                                   | 7.00    | <b>This work</b> |                  |
| <b>BPA</b>                                                      |                                                                                                                            | CuFe <sub>2</sub> O <sub>4</sub> -CoFe <sub>2</sub> O <sub>4</sub> [20 mg/L] | 100                                       | PMS [0.3 g/L]                          | 99.3    | 7.01             | [24]             |
|                                                                 | 13%-Mn-FeBC [0.5 g/L] <sup>17</sup>                                                                                        | 120                                                                          | PMS [4.0 mM]                              | 100                                    | 12.0    | [25]             |                  |
|                                                                 | CuO/Cu <sub>2</sub> O [500mg/L] <sup>18</sup>                                                                              | 10                                                                           | PMS [150mg/L]                             | 99                                     | 11.0    | [26]             |                  |
|                                                                 | CuO-CN [0.5 g/L] <sup>19</sup>                                                                                             | 30                                                                           | PMS [100 mg/L]                            | 80                                     | -       | [27]             |                  |
|                                                                 | MS-(AgC)/Cu [0.5 g/L]                                                                                                      | 30                                                                           | PMS [1.5 mM]                              | 99.1                                   | 7.00    | <b>This work</b> |                  |
|                                                                 | <b>HEPES</b>                                                                                                               | OBW/HP@CoNP [50 ppm] <sup>20</sup>                                           | 20                                        | PMS [1.25 mM]                          | 98      | 7.40             | [28]             |
|                                                                 |                                                                                                                            | MS-(AgC)/Cu [0.5 g/L]                                                        | 30                                        | PMS [1.5 mM]                           | 98.3    | 7.00             | <b>This work</b> |

<sup>1</sup> Fenton sludge was converted into magnetic sludge-based biochar.<sup>2</sup> Magnesium (II) porphyrin with the ligand hexamethylenetetramine.<sup>3</sup> Zeolite encapsulated Fe nanocatalyst.<sup>4</sup> Layered double hydroxide(LDH).<sup>5</sup> Zeolitic imidazolate framework-67(ZIF-67).

- <sup>6</sup> Zeolitic imidazolate framework(ZIF).
- <sup>7</sup> Ce-doped MOF (Metal–organic framework)/calcination temperature of catalyst 400 °C.
- <sup>8</sup> Mixed niobium-cerium oxide.
- <sup>9</sup> Calcined nitrogen-containing carbon//FeCo<sub>2</sub>O<sub>4</sub> composites.
- <sup>10</sup> Fenton chitosan-Fe catalyst.
- <sup>11</sup> Magnetite nanoparticles (Fe<sub>3</sub>O<sub>4</sub>-NPs)/orange peel.
- <sup>12</sup> Dicyandiamide immobilized on the surface of carbon cloth.
- <sup>13</sup> Activated carbon using pistachio.
- <sup>14</sup> Fe<sub>3</sub>C/Fe<sub>3</sub>O<sub>4</sub>/C.
- <sup>15</sup> Hydroxyapatite.
- <sup>16</sup> Cupric oxide nanoleaves.
- <sup>17</sup> x-Mn-FeBC, where x represents the mass percentage of KMnO<sub>4</sub> to DS (dry sludge).
- <sup>18</sup> A novel B-doped CuO/Cu<sub>2</sub>O composite material.
- <sup>19</sup> Copper oxide/graphitic carbon nitride.
- <sup>20</sup> Ostrich bone waste/Hydrogen peroxide.



**Table 4S.** Comparison of catalytic activity of MS-(AgC)/Cu in selective aerobic oxidation of cyclohexene with various catalytic systems.

| No. | Catalytic System                                                                                 | X, % | S, %     |       |        | [Ref]            |
|-----|--------------------------------------------------------------------------------------------------|------|----------|-------|--------|------------------|
|     |                                                                                                  |      | CY-epoxy | CY-ol | CY-one |                  |
| 1   | CoFe <sub>2</sub> O <sub>4</sub> , 80 °C, 6h, CH <sub>3</sub> CN, O <sub>2</sub>                 | 63.0 | 8.0      | 9.0   | 25.0   | [29]             |
| 2   | PVDA1-PMo <sup>1</sup> , 130°C, 7h, CH <sub>3</sub> CN, O <sub>2</sub>                           | 85.7 | -        | -     | 51.9   | [30]             |
| 3   | Ti-Beta zeolite, 59.85 °C, 2 h, CH <sub>3</sub> CN, H <sub>2</sub> O <sub>2</sub>                | 27.9 |          |       |        | [31]             |
| 4   | MoCeNR <sup>2</sup> , 80°C, 2 h, Toluene, TBHP                                                   | 98.9 | 97.3     | 0.90  | 1.80   | [32]             |
| 5   | Cu-g-C <sub>3</sub> N <sub>4</sub> <sup>3</sup> , 75 °C, 6 h, CH <sub>3</sub> Cl, O <sub>2</sub> | 82.0 | 55.0     |       |        | [33]             |
| 6   | Cu-MOF-74, 25°C, 24 h, O <sub>2</sub>                                                            | 35.0 | -        | 25.0  | 61.0   | [34]             |
| 7   | Co-MOF-74, 25°C, 24h, O <sub>2</sub>                                                             | 31.0 | -        | 35.0  | 59.0   | [34]             |
| 8   | SBA15. DAFO.Pd(II) <sup>4</sup> , 60 °C, 12 h, CH <sub>3</sub> CN, H <sub>2</sub> O <sub>2</sub> | 89.3 | -        | 9.10  | 16.3   | [35]             |
| 9   | LaCuODA <sup>5</sup> , 75 °C, 24h, O <sub>2</sub>                                                | 67.0 | -        | 40.0  | 55.0   | [36]             |
| 10  | LaCoODA <sup>6</sup> , 75 °C, 24 h, O <sub>2</sub>                                               | 85.0 | -        | 25.0  | 75.0   | [36]             |
| 11  | CuO FL <sup>7</sup> , 80°C, 24 h, CH <sub>3</sub> CN, O <sub>2</sub>                             | 97.6 | -        | -     | 64.1   | [37]             |
| 12  | ZnMOF-74, 80°C, 4 h, O <sub>2</sub>                                                              | 66.5 | 12.5     | 65.4  | 13.9   | [38]             |
| 13  | NiMOF-74, 80°C, 4 h, O <sub>2</sub>                                                              | 59.0 | 8.70     | 74.3  | 13.3   | [38]             |
| 14  | CoMOF-74, 80°C, 4 h, O <sub>2</sub>                                                              | 52.3 | 18.9     | 29.4  | 22.2   | [38]             |
| 15  | Co(II)-L@nano-SiO <sub>2</sub> , 75°C, 8 h, CH <sub>3</sub> CN, O <sub>2</sub>                   | 61.0 | 6.50     | 10.3  | 46.9   | [39]             |
| 16  | AgCN <sup>8</sup> , 60 °C 20 h, CH <sub>3</sub> CN, H <sub>2</sub> O <sub>2</sub>                | ~100 | 76.0     | -     | -      | [40]             |
| 17  | Ti-PMO-S10 <sup>9</sup> , 70 °C, 25 h, CH <sub>3</sub> CN, TBHP                                  | 30.5 | 93.8     | -     | 3.2    | [41]             |
| 18  | Ru/TiO <sub>2</sub> NFs <sup>10</sup> , 75 °C, 4.5 h, O <sub>2</sub>                             | 95.0 | 7.00     | 11.0  | 80.0   | [42]             |
| 19  | LaCoO <sub>3</sub> , 80°C, 6 h, TBHP /O <sub>2</sub>                                             | 89.8 | -        | -     | 47.8   | [43]             |
| 20  | Co <sub>5</sub> Ce <sub>5</sub> / γ-Al <sub>2</sub> O <sub>3</sub> , 80 °C, 6 h, O <sub>2</sub>  | 84.0 | -        | 30.0  | 38.0   | [44]             |
| 21  | MS-(AgC)/Cu, NDHPI, 80 °C, ACN, O <sub>2</sub>                                                   | 91.8 | 5.40     | 9.10  | 85.3   | <b>This work</b> |

<sup>1</sup>Heteropolyacid-based poly ionic liquids.

<sup>2</sup>Nanorods.

<sup>3</sup> Catalysts consisting of Cu single atoms anchored on graphitic carbon nitride.

<sup>4</sup>4, 5-diazofluorene-9-one (DAFO).

<sup>5</sup> {[La<sub>2</sub>Cu<sub>3</sub>(μ-H<sub>2</sub>O)(ODA)<sub>6</sub>(H<sub>2</sub>O)<sub>3</sub>].3H<sub>2</sub>O}<sub>n</sub>.

<sup>6</sup> {[La<sub>2</sub>Co<sub>3</sub>(ODA)<sub>6</sub>(H<sub>2</sub>O)<sub>6</sub>].12H<sub>2</sub>O}<sub>n</sub> / m; i: flower (FL).

<sup>7</sup>Flowers (FLs).

<sup>8</sup>Silver cyanide.

<sup>9</sup>Ti-containing Periodic Mesoporous Organosilica (PMO).

<sup>10</sup>Ruthenium- Nanofibers (NFs).

**Table 5S.** Commercial price used for fabrication of MS-(AgC)/Cu.

| Material                               | CAS. Number       | V (mL) or W (g) | Price (\$·g <sup>-1</sup> ) |
|----------------------------------------|-------------------|-----------------|-----------------------------|
| FeCl <sub>2</sub> ·4H <sub>2</sub> O   | 13478-10-9        | 0.20 g          | 0.020                       |
| FeCl <sub>3</sub> ·6H <sub>2</sub> O   | 10025-77-1        | 0.40 g          | 0.063                       |
| HCl                                    | Dr Mojallali, Co. | 3.0 mL          | 0.003                       |
| NaOH                                   | Arvand parak, Co. | 6.00 g          | 0.053                       |
| NH <sub>4</sub> OH                     | Dr Mojallali, Co. | 4.0 mL          | 0.013                       |
| EtOH                                   | Simin Tak, Co.    | 40 mL           | 0.030                       |
| TEOS                                   | 78-10-4           | 0.6 mL          | 0.050                       |
| APTS                                   | 13822-56-5        | 0.1 mL          | 0.050                       |
| Chitosan                               | 9012-76-4         | 0.10 g          | 0.017                       |
| AcOH                                   | 64-19-7           | 0.4 mL          | 0.030                       |
| Glutaraldehyde                         | Simin Tak, Co.    | 2.0 mL          | 0.040                       |
| Cu(OAc) <sub>2</sub>                   | 6156-78-1         | 0.25 g          | 0.017                       |
| <b>Total price (\$·g<sup>-1</sup>)</b> |                   |                 | <b>0.386</b>                |

**Table 6S.** Screening data for the cost of the various systems for degradation of 1m<sup>3</sup> HEPES.

| No. | Pollutant/m <sup>3</sup> | Catalytic system                                               | Cost (\$ /m <sup>3</sup> ) | [Ref]     |
|-----|--------------------------|----------------------------------------------------------------|----------------------------|-----------|
| 1   | Tetracycline             | PS+ $\gamma$ -Fe <sub>2</sub> O <sub>3</sub> -CeO <sub>2</sub> | 0.106                      | [45]      |
| 2   | Ketoprofen               | PS+Fe <sup>2+</sup>                                            | 0.517                      | [46]      |
| 3   | Ketoprofen               | PS+Thermal                                                     | 44.41                      | [46]      |
| 4   | Ketoprofen               | PS+UV                                                          | 0.176                      | [46]      |
| 5   | HEPES                    | PMS+MS-(AgC)/Cu                                                | 27.57                      | This work |

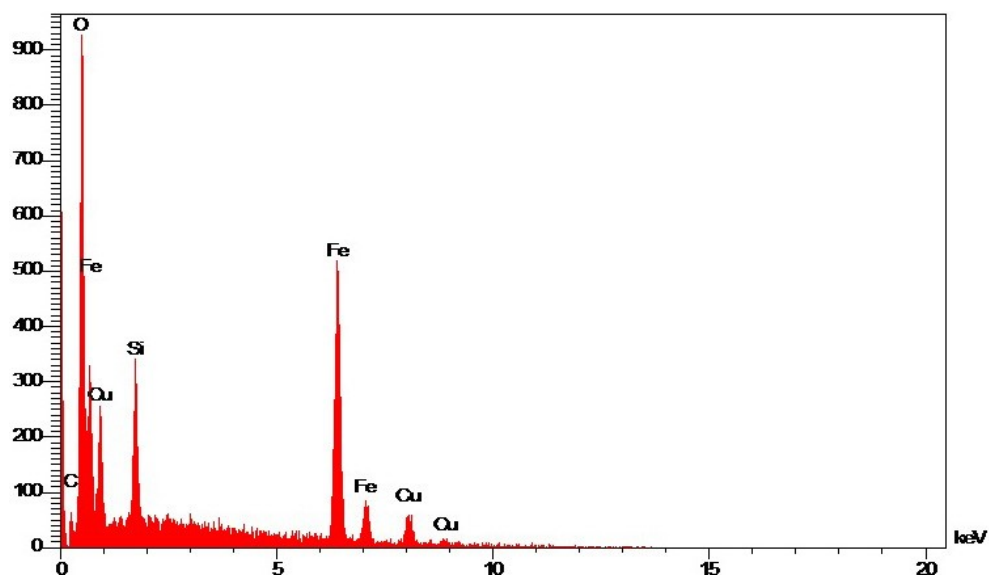

**Fig 1S.** EDS spectrum of MS-(AgC)/Cu.

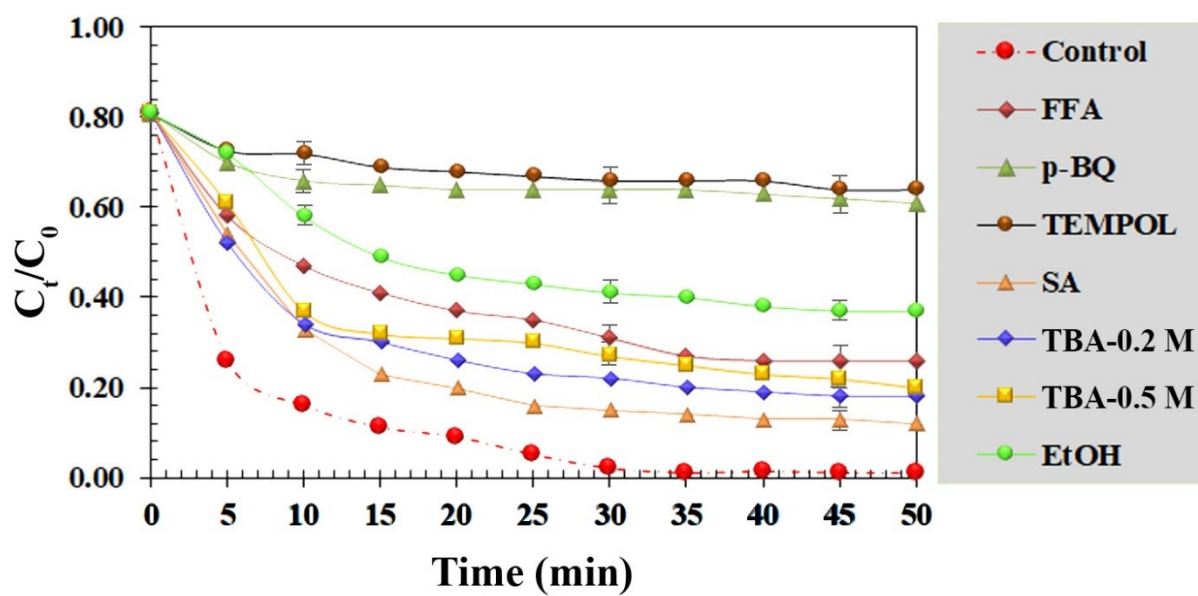

**Fig.2S.** Effect of quenching scavengers on degradation efficiency (%) for HEPES degradation  $[[MS-(AgC)/Cu]_0 = 0.5 \text{ g/L}, [HEPES]_0 = 10 \text{ mg/L}, \text{pH} = 7.0, T = 25 \text{ }^\circ\text{C}, [PMS]_0 = 1.5 \text{ mM}]$ .

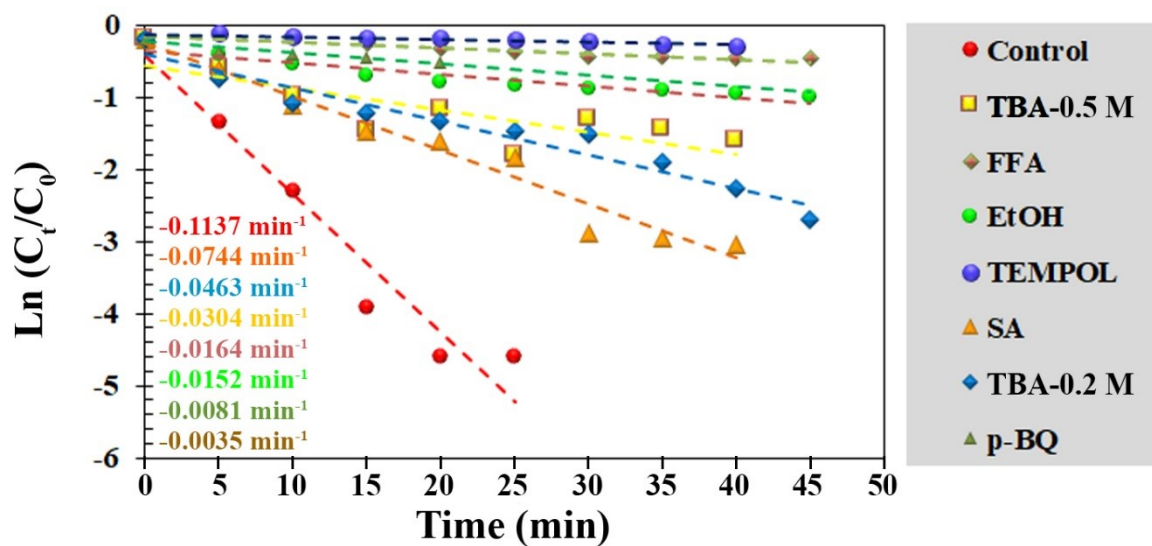

**Fig.3S.** Effect of quenching scavengers on The reaction rates of HEPES degradation [[MS-(AgC)/Cu]<sub>0</sub> = 0.5 g/L, [HEPES]<sub>0</sub> = 10 mg/L, pH = 7.0, T = 25 °C, [PMS]<sub>0</sub> = 1.5 mM)].

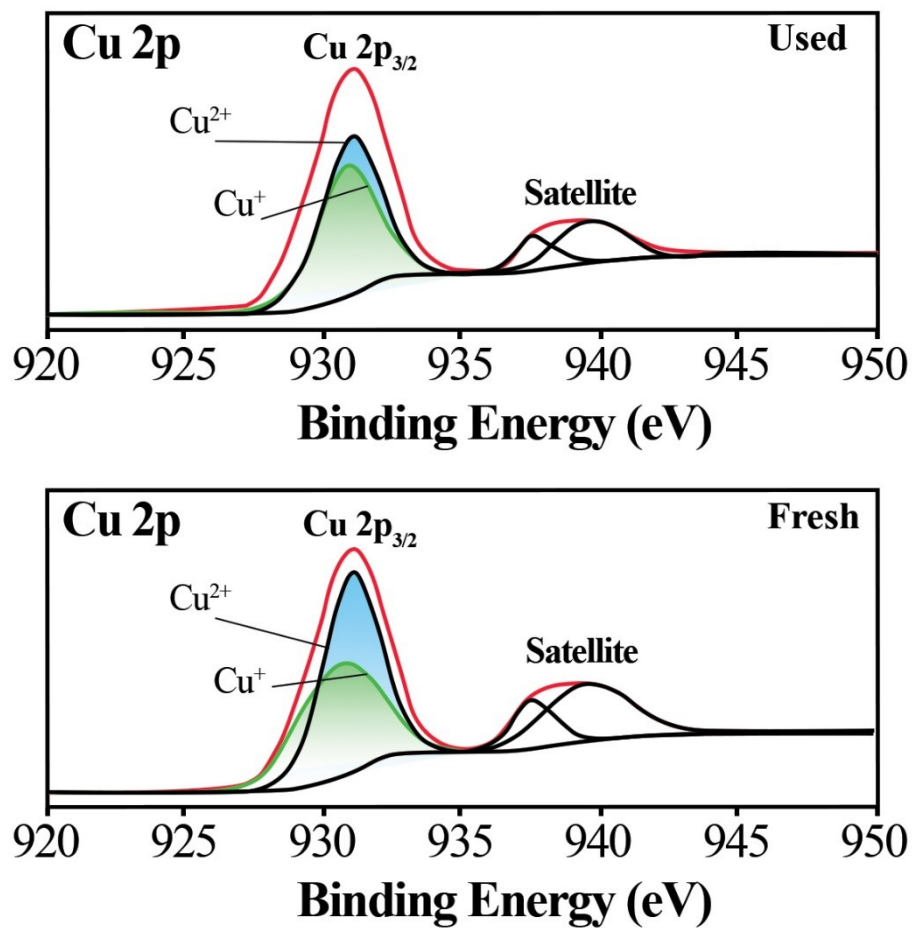

**Fig.4S.** XPS spectrum of Cu2p in (A) fresh, and (B) used MS-(AgC)/Cu.

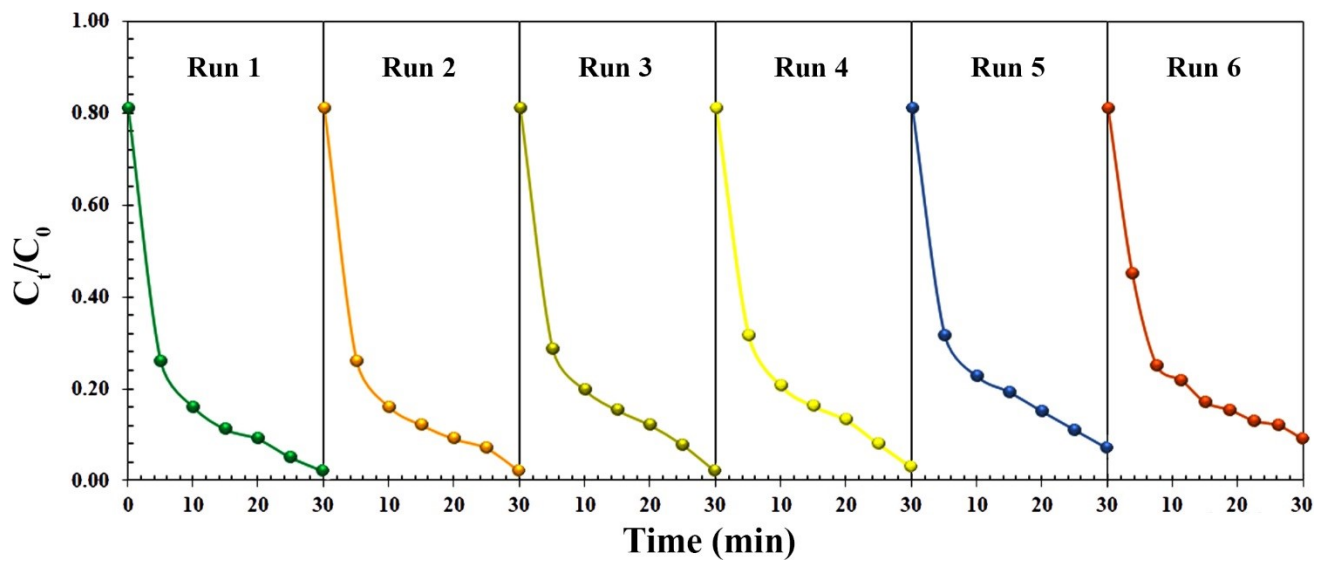

**Fig. 5S.** Long-term stability of MS-(AgC)/Cu in degradation of HEPES  $[[\text{MS-(AgC)/Cu}]_0 = 0.5 \text{ g/L}$ ,  $[\text{HEPES}]_0 = 10 \text{ mg/L}$ ,  $\text{pH} = 7.0$ ,  $T = 25 \text{ }^\circ\text{C}$ ,  $[\text{PMS}]_0 = 1.5 \text{ mM}]$ .



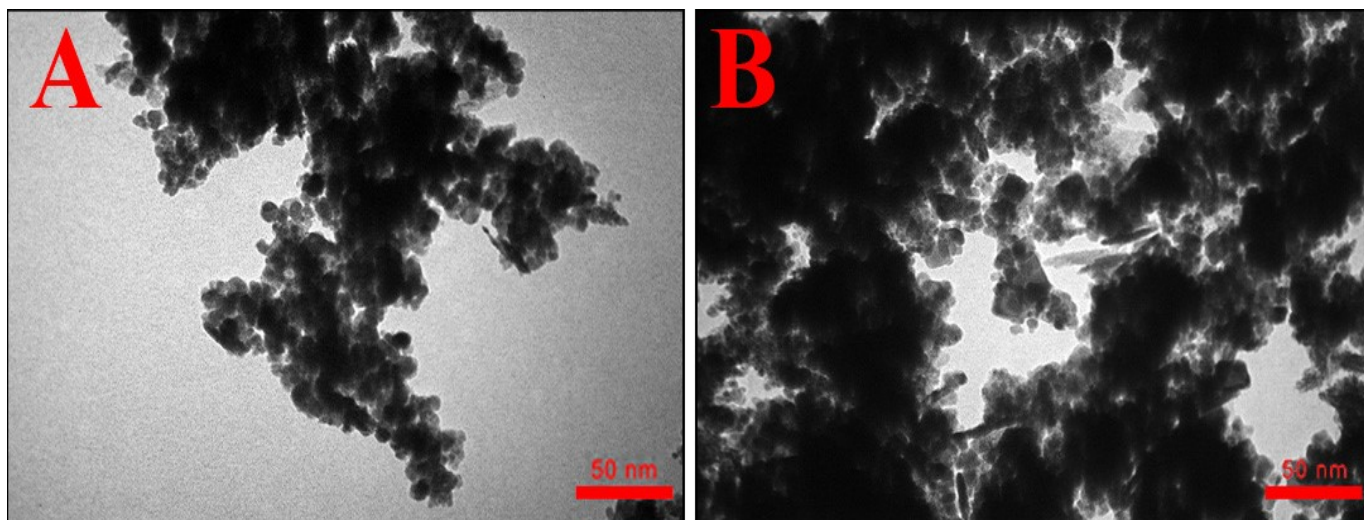

**Fig. 6S.** Selected TEM images of used MS-(AgC)/Cu for (A) four times, and (B) seven times in HEPES degradation.

## References

- [1] Ye G, Zhou J, Huang R, Ke Y, Peng Y, Zhou Y, Weng Y, Ling C, Pan W. Magnetic sludge-based biochar derived from Fenton sludge as an efficient heterogeneous Fenton catalyst for degrading Methylene blue. *Journal of Environmental Chemical Engineering*. 2022 Jan 21:107242.
- [2] Ezzayani K, Khelifa AB, Guesmi A, Hamadi NB, Abd El-Fattah W, Nasri H. Application of a new synthesized magnesium porphyrin complex in the degradation of methylene blue dye. *Journal of Molecular Structure*. 2022 Jun 15;1258:132663.
- [3] Guo H, Chen L, Zhang X, Chen H, Shao Y. Silicalite-1 Zeolite Encapsulated Fe Nanocatalyst for Fenton-like Degradation of Methylene Blue. *Chinese Journal of Chemical Engineering*. 2022 Mar 23.
- [4] Wang L, Wang Y, Lv W, Yao Y. Activation of peroxymonosulfate by MgCoAl layered double hydroxide: Potential enhancement effects of catalyst morphology and coexisting anions. *Chemosphere*. 2022 Jan 1;286:131640.
- [5] Wu X, Sun D, Ma H, Ma C, Zhang X, Hao J. Activation of peroxymonosulfate by magnetic CuFe<sub>2</sub>O<sub>4</sub>@ ZIF-67 composite catalyst for the study on the degradation of methylene blue. *Colloids and Surfaces A: Physicochemical and Engineering Aspects*. 2022 Jan 7:128278.
- [6] Luong TH, Nguyen TH, Nguyen BV, Nguyen NK, Nguyen TQ, Dang GH. Efficient degradation of methyl orange and methylene blue in aqueous solution using a novel Fenton-like catalytic of CuCo-ZIFs. *Green Processing and Synthesis*. 2022 Jan 1;11(1):71-83.
- [7] Guo B, Ma J, Shi Y, Zheng K, Wu M, Ren G, Komarneni S. Co<sub>3</sub>O<sub>4</sub>/CoO ceramic catalyst: Bisulfite assisted catalytic degradation of methylene blue. *Ceramics International*. 2021 Oct 1;47(19):27617-23.
- [8] Dong X, Lin Y, Ren G, Ma Y, Zhao L. Catalytic degradation of methylene blue by fenton-like oxidation of Ce-doped MOF. *Colloids and Surfaces A: Physicochemical and Engineering Aspects*. 2021 Jan 5;608:125578.
- [9] Luo W, Chen Q, Ji L, Peng X, Huang G. Synergistic effect of various elements in Fe<sub>41</sub>Co<sub>7</sub>Cr<sub>15</sub>Mo<sub>14</sub>C<sub>15</sub>B<sub>6</sub>Y<sub>2</sub> amorphous alloy hollow ball on catalytic degradation of methylene blue. *Journal of Rare Earths*. 2022 Apr 1;40(4):605-15.
- [10] Lin S, Zhang T, Fu D, Zhou X. Utilization of magnesium resources in salt lake brine and catalytic degradation of dye wastewater by doping cobalt and nickel. *Separation and Purification Technology*. 2021 Sep 1;270:118808.
- [11] Wolski L, Sobańska K, Walkowiak A, Akhmetova K, Gryboś J, Frankowski M, Ziolk M, Pietrzyk P. Enhanced adsorption and degradation of methylene blue over mixed niobium-cerium oxide—Unraveling the synergy between Nb and Ce in advanced oxidation processes. *Journal of Hazardous Materials*. 2021 Aug 5;415:125665.

- [12] Zhang T, Ma Q, Zhou M, Li C, Sun J, Shi W, Ai S. Degradation of methylene blue by a heterogeneous Fenton reaction catalyzed by FeCo<sub>2</sub>O<sub>4</sub>-NC nanocomposites derived by ZIFs. *Powder Technology*. 2021 May 1;383:212-9.
- [13] Kabel, K.I., Mady, A.H. and Rabie, A.M., 2021. Novel preparation of ferromanganese oxide based on hyperbranched polymer for peroxymonosulfate activation as a robust catalyst for the degradation of organic pollutants. *Environmental Technology & Innovation*, 22, p.101435.
- [14] Zhang, S., Fan, Q., Gao, H., Huang, Y., Liu, X., Li, J., Xu, X. and Wang, X., 2016. Formation of Fe<sub>3</sub>O<sub>4</sub>@MnO<sub>2</sub> ball-in-ball hollow spheres as a high performance catalyst with enhanced catalytic performances. *Journal of Materials Chemistry A*, 4(4), pp.1414-1422.
- [15] Gao, M., Zhang, D., Li, W., Chang, J., Lin, Q., Xu, D. and Ma, H., 2016. Degradation of methylene blue in a heterogeneous Fenton reaction catalyzed by chitosan crosslinked ferrous complex. *Journal of the Taiwan Institute of Chemical Engineers*, 67, pp.355-361.
- [16] Zhao Q, Zhang C, Tong X, Zou Y, Li Y, Wei F. Fe<sub>3</sub>O<sub>4</sub>-NPs/orange peel composite as magnetic heterogeneous Fenton-like catalyst towards high-efficiency degradation of methyl orange. *Water Science and Technology*. 2021 Jul 1;84(1):159-71.
- [17] Yang L, Chen W, Sheng C, Wu H, Mao N, Zhang H. Fe/N-codoped carbocatalysts loaded on carbon cloth (CC) for activating peroxymonosulfate (PMS) to degrade methyl orange dyes. *Applied Surface Science*. 2021 May 30;549:149300.
- [18] Gholami A, Mousavinia F. Eco-friendly approach for efficient catalytic degradation of organic dyes through peroxymonosulfate activated with pistachio shell-derived biochar and activated carbon. *Environmental Technology*. 2021 May 13:1-8.
- [19] Gangwar A, Singh A, Pal S, Sinha I, Meena SS, Prasad NK. Magnetic nanocomposites of Fe<sub>3</sub>C or Ni-substituted (Fe<sub>3</sub>C/Fe<sub>3</sub>O<sub>4</sub>) with carbon for degradation of methylene orange and p-nitrophenol. *Journal of Cleaner Production*. 2021 Aug 1;309:127372.
- [20] Das KC, Das B, Dhar SS. Effective catalytic degradation of organic dyes by nickel supported on hydroxyapatite-encapsulated cobalt ferrite (Ni/HAP/CoFe<sub>2</sub>O<sub>4</sub>) magnetic novel nanocomposite. *Water, Air, & Soil Pollution*. 2020 Feb;231(2):1-3.
- [21] Sun X, Xu D, Dai P, Liu X, Tan F, Guo Q. Efficient degradation of methyl orange in water via both radical and non-radical pathways using Fe-Co bimetal-doped MCM-41 as peroxymonosulfate activator. *Chemical Engineering Journal*. 2020 Dec 15; 402:125881.
- [22] Londoño-Calderón CL, Menchaca-Nal S, François NJ, Pampillo LG, Froimowicz P. Cupric Oxide Nanoleaves for the Oxidative Degradation of Methyl Orange without Heating or Light. *ACS Applied Nano Materials*. 2020 Feb 27;3(3):2987-96.
- [23] Sun, B., Li, H., Li, X., Liu, X., Zhang, C., Xu, H. and Zhao, X.S., 2018. Degradation of organic dyes over fenton-like Cu<sub>2</sub>O–Cu/C catalysts. *Industrial & Engineering Chemistry Research*, 57(42), pp.14011-14021.

- [24] Li Z, Wang F, Zhang Y, Lai Y, Fang Q, Duan Y. Activation of peroxymonosulfate by  $\text{CuFe}_2\text{O}_4\text{-CoFe}_2\text{O}_4$  composite catalyst for efficient bisphenol a degradation: Synthesis, catalytic mechanism and products toxicity assessment. *Chemical Engineering Journal*. 2021 Nov 1; 423:130093.
- [25] Kou, L., Wang, J., Zhao, L., Jiang, K. and Xu, X., 2021. Coupling of  $\text{KMnO}_4$ -assisted sludge dewatering and pyrolysis to prepare Mn, Fe-codoped biochar catalysts for peroxymonosulfate-induced elimination of phenolic pollutants. *Chemical Engineering Journal*, 411, p.128459.
- [26] Ding Y, Li D, Zuo S, Guan Z, Ding S. Boron-doping accelerated Cu (II)/Cu (I) cycle for enhancing peroxymonosulfate activation. *Separation and Purification Technology*. 2022 Feb 1; 282:120086.
- [27] Zuo S, Li D, Yang F, Xu H, Huang M, Guan Z, Xia D. Copper oxide/graphitic carbon nitride composite for bisphenol a degradation by boosted peroxymonosulfate activation: Mechanism of Cu-O covalency governs. *Journal of Colloid and Interface Science*. 2021 Dec 1; 603:85-93.
- [28] Amiri MJ, Faraji A, Azizi M, Nejad BG, Arshadi M. Recycling bone waste and cobalt-wastewater into a highly stable and efficient activator of peroxymonosulfate for dye and HEPES degradation. *Process Safety and Environmental Protection*. 2021 Mar 1;147:626-41.
- [29] Bükler J, Angel S, Salamon S, Landers J, Falk T, Wende H, Wiggers H, Schulz C, Muhler M, Peng B. Structure-activity correlation in aerobic cyclohexene oxidation and peroxide decomposition over  $\text{Co}_x\text{Fe}_{3-x}\text{O}_4$  spinel oxides. *Catalysis Science & Technology*. 2022.
- [30] Wu Y, Su M, Xiao Y, Guang B, Liu Y. Heteropolyacid-Based Poly (ionic liquid) s for the Selective Oxidation of Cyclohexene to 2-Cyclohexene-1-one. *Industrial & Engineering Chemistry Research*. 2021 Dec 29.
- [31] Pan H, Peng R, Zhu Z, Xu H, He M, Wu P. Highly Hydrophilic Ti- Beta Zeolite with Ti-Rich Exterior as Efficient Catalyst for Cyclohexene Epoxidation. *Catalysts*. 2022 Apr 12;12(4):434.
- [32] Sudarsanam P, Singh N, Kalbande PN. Shape-controlled nanostructured  $\text{MoO}_3/\text{CeO}_2$  catalysts for selective cyclohexene epoxidation. *Catalysis Communications*. 2022 Apr 1; 164:106433.
- [33] Bükler J, Huang X, Bitzer J, Kleist W, Muhler M, Peng B. Synthesis of Cu single atoms supported on mesoporous graphitic carbon nitride and their application in liquid-phase aerobic oxidation of cyclohexene. *ACS catalysis*. 2021 Jun 15;11(13):7863-75.

- [34] Flores JG, Aguilar-Pliego J, Martin-Guaregua N, Ibarra IA, Sanchez-Sanchez M. Room-temperature prepared bimetallic nanocrystalline MOF-74 as catalysts in the aerobic oxidation of cyclohexene. *Catalysis Today*. 2021 Aug 28.
- [35] Wu L, Han Y, Qi Y, Fu X, Chen R, Li J. Catalytic Oxidation of Cyclohexene by H<sub>2</sub>O<sub>2</sub> Over Pd (II)-Complex Catalyst in a Heterogeneous System. *Catalysis Letters*. 2022 Jan 31:1-0.
- [36] Santibáñez L, Escalona N, Torres J, Kremer C, Cancino P, Spodine E. CuII-and CoII-Based MOFs: {[La<sub>2</sub>Cu<sub>3</sub> (μ-H<sub>2</sub>O)(ODA) 6 (H<sub>2</sub>O) 3]· 3H<sub>2</sub>O} n and {[La<sub>2</sub>Co<sub>3</sub> (ODA) 6 (H<sub>2</sub>O) 6]· 12H<sub>2</sub>O} n. The Relevance of Physicochemical Properties on the Catalytic Aerobic Oxidation of Cyclohexene. *Catalysts*. 2020 May;10(5):589.
- [37] Mal DD, Kundu J, Pradhan D. CuO {001} as the Most Active Exposed Facet for Allylic Oxidation of Cyclohexene via a Greener Route. *ChemCatChem*. 2021 Jan 12;13(1):362-72.
- [38] Jodłowski PJ, Kurowski G, Dymek K, Jędrzejczyk RJ, Jeleń P, Gancarczyk A, Węgrzynowicz A, Sawoszczuk T, Sitarz M. In situ deposition of M (M= Zn; Ni; Co)-MOF-74 over structured carriers for cyclohexene oxidation-Spectroscopic and microscopic characterisation. *Microporous and Mesoporous Materials*. 2020 Aug 15;303:110249.
- [39] Duan M, Wang X, Peng W, Liu D, Cheng Q, Yang Q. Co (II) Schiff Base Complex Supported on Nano-Silica for the Aerobic Oxidation of Cyclohexene: Reaction Pathways and Overoxidation on the Experimental and Calculated Mechanism. *ChemistrySelect*. 2021 Mar 26;6(12):2869-77.
- [40] Lu YJ, Janmanchi D, Natarajan T, Lin ZH, Wanna WH, Hsu IJ, Tzou DL, Ayalew Abay T, Yu SS. Silver Cyanide Powder-Catalyzed Selective Epoxidation of Cyclohexene and Styrene with its Surface Activation by H<sub>2</sub>O<sub>2</sub> (aq) and Assisted by CH<sub>3</sub>CN as a Non-Innocent Solvent. *ChemCatChem*.: e202200030.
- [41] Awoke Y, Chebude Y, Díaz I. Ti-PMO materials as selective catalysts for the epoxidation of cyclohexene and vernonia oil. *Catalysis Today*. 2022 May 1;390:246-57.
- [42] Qadir MI, Baptista DL, Dupont J. Effect of Support Nature on Ruthenium-Catalyzed Allylic Oxidation of Cycloalkenes. *Catalysis Letters*. 2022 Jan 6:1-8.
- [43] Büker J, Alkan B, Fu Q, Xia W, Schulwitz J, Waffel D, Falk T, Schulz C, Wiggers H, Muhler M, Peng B. Selective cyclohexene oxidation with O<sub>2</sub>, H<sub>2</sub>O<sub>2</sub> and *tert*-butyl hydroperoxide over spray-flame synthesized LaCo<sub>1-x</sub>Fe<sub>x</sub>O<sub>3</sub> nanoparticles. *Catalysis Science & Technology*. 2020;10(15):5196-206.
- [44] Kurowski G, Jeleń P, Sitarz M, Jodłowski PJ. Spectroscopic and microscopic studies of Co, Ce, and Pd containing gamma-alumina as catalysts for cyclohexene oxidation. *Journal of Molecular Structure*. 2022 Aug 5; 1261:132880.
- [45] L. Niu, G. Zhang, G. Xian, Z. Ren, T. Wei, Q. Li, Y. Zhang, Z. Zou. Tetracycline degradation by persulfate activated with magnetic γ-Fe<sub>2</sub>O<sub>3</sub>/CeO<sub>2</sub> catalyst: performance, activation mechanism and degradation pathway. *Separation and Purification Technology*. 259 (2021) 118156.

[46] Amasha M, Baalbaki A, Ghauch A. A comparative study of the common persulfate activation techniques for the complete degradation of an NSAID: the case of ketoprofen. *Chemical Engineering Journal*. 2018 Oct 15; 350:395-410.
